**A**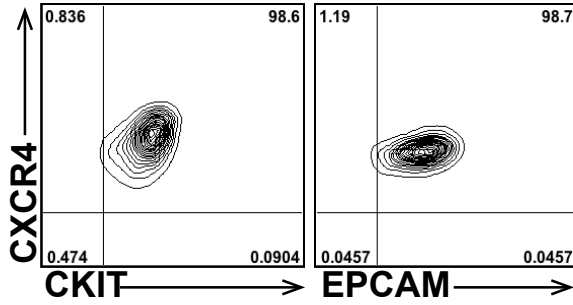**B**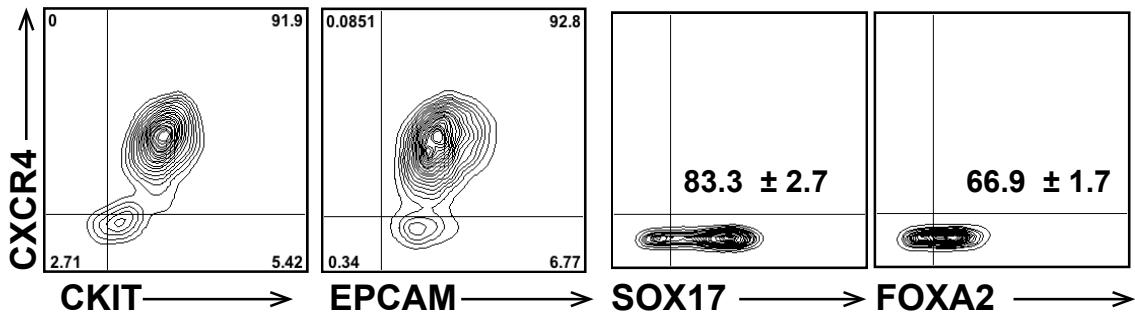**C**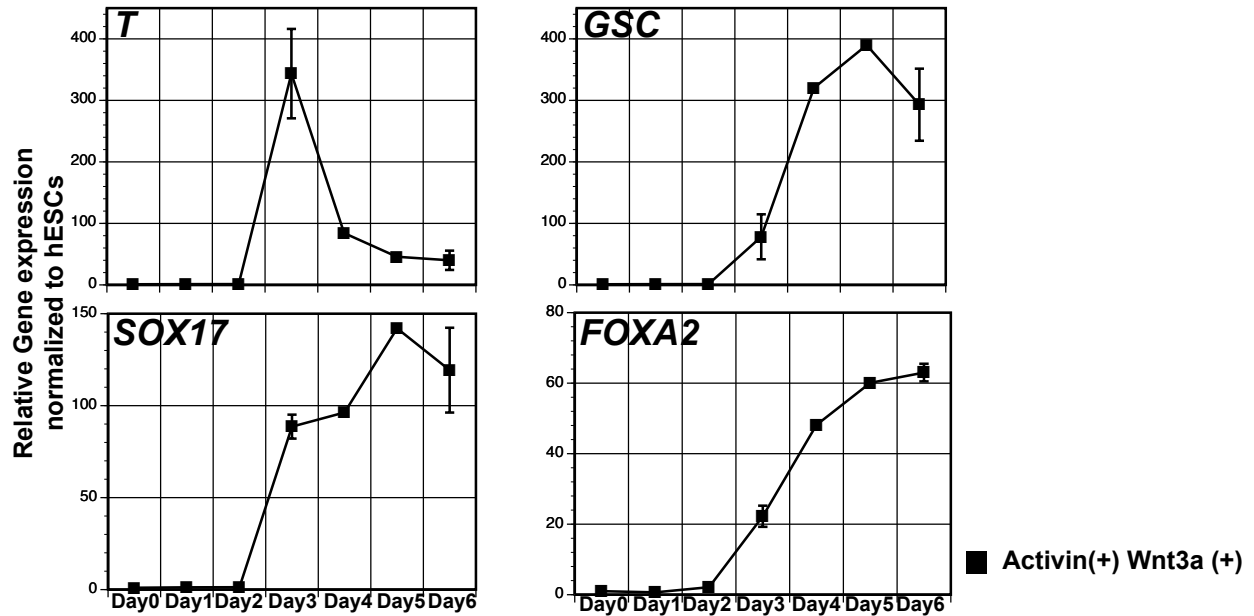

**Fig. S1. Endoderm induction in hESC-derived embryoid bodies.** (A) Flow cytometric analysis showing co-expression EPCAM and CXCR4 on day 6 EBs. (B) Flow cytometric analysis showing the proportion of CXCR4<sup>+</sup>, KIT<sup>+</sup>, EPCAM<sup>+</sup>, SOX17<sup>+</sup> and FOXA2<sup>+</sup> cells in day 6 EBs induced with activin in neural-based medium. (C) RT-qPCR based analyses of *T*, *SOX17*, *GSC* and *FOXA2* expression in activin/Wnt3a-induced EBs. EBs were analyzed at the indicated time points. Bars represent s.d. of the mean of three independent experiments.

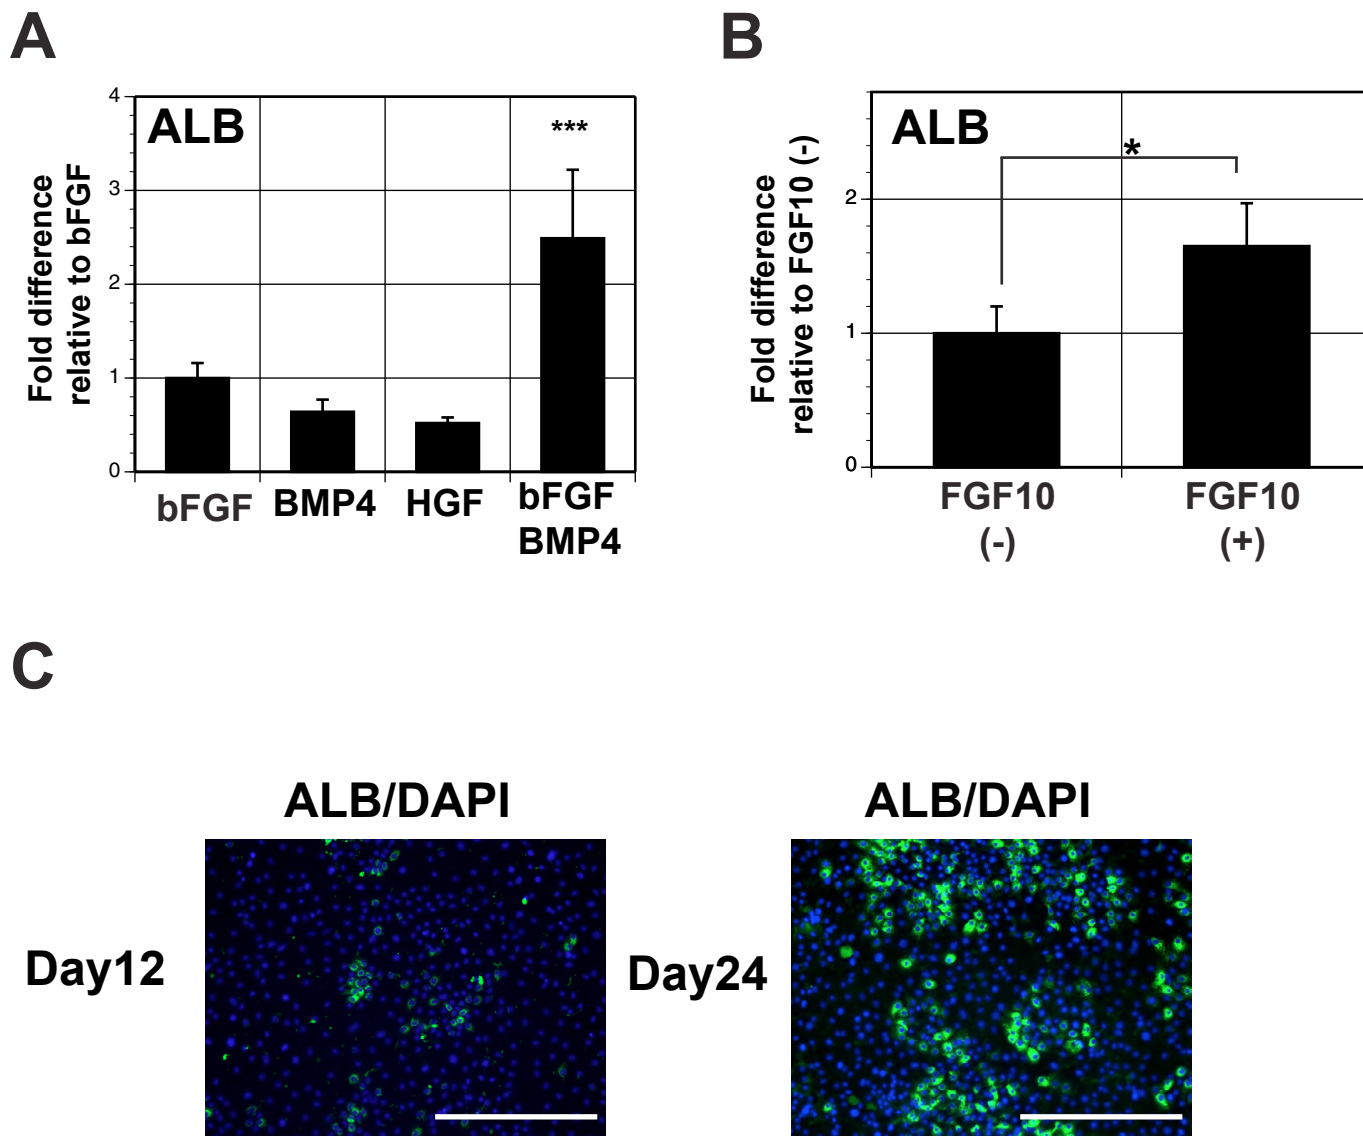

**Fig. S2. RT-qPCR analysis of albumin expression in monolayer cultures specified with the indicated cytokines.** (A) Cells were treated with the different factors (bFGF 10 ng/ml; BMP4 50 ng/ml; HGF 20 ng/ml; or bFGF 20 ng/ml plus BMP4 50 ng/ml) from 6 days to day 12 and then cultured with DEX, HGF and OSM, and analyzed at day 24. Bars represent the s.d. of the mean of three independent experiments. Values are determined relative to *TBP* and presented relative to expression in bFGF (20 ng/ml) culture, which is set to 1. \*\*\* $P < 0.001$  when compared with the culture treated with bFGF. Student's *t*-test,  $n = 3$ . (B) RT-qPCR analysis of albumin expression in populations specified in the presence and absence of FGF10. Cultures were treated (or not) with FGF10 (50 ng/ml) plus BMP4 (50 ng/ml) between days 6 and 8. At this stage, the FGF10 was removed and the cells cultured in bFGF/BMP4 between 8 and 12. Bars represent the s.d. of the mean of three independent experiments. Values are determined relative to *TBP* and presented relative to expression in FGF10 (-) culture, which is set to 1. \* $P < 0.05$ , Student's *t*-test,  $n = 3$ . (C) Immunostaining analyses showing the presence of ALB<sup>+</sup> cells at days 12 and 24 of culture. ALB is visualized with Alexa 488 (green). DAPI (blue) staining shows the nuclei. Scale bar, 200  $\mu\text{m}$ .

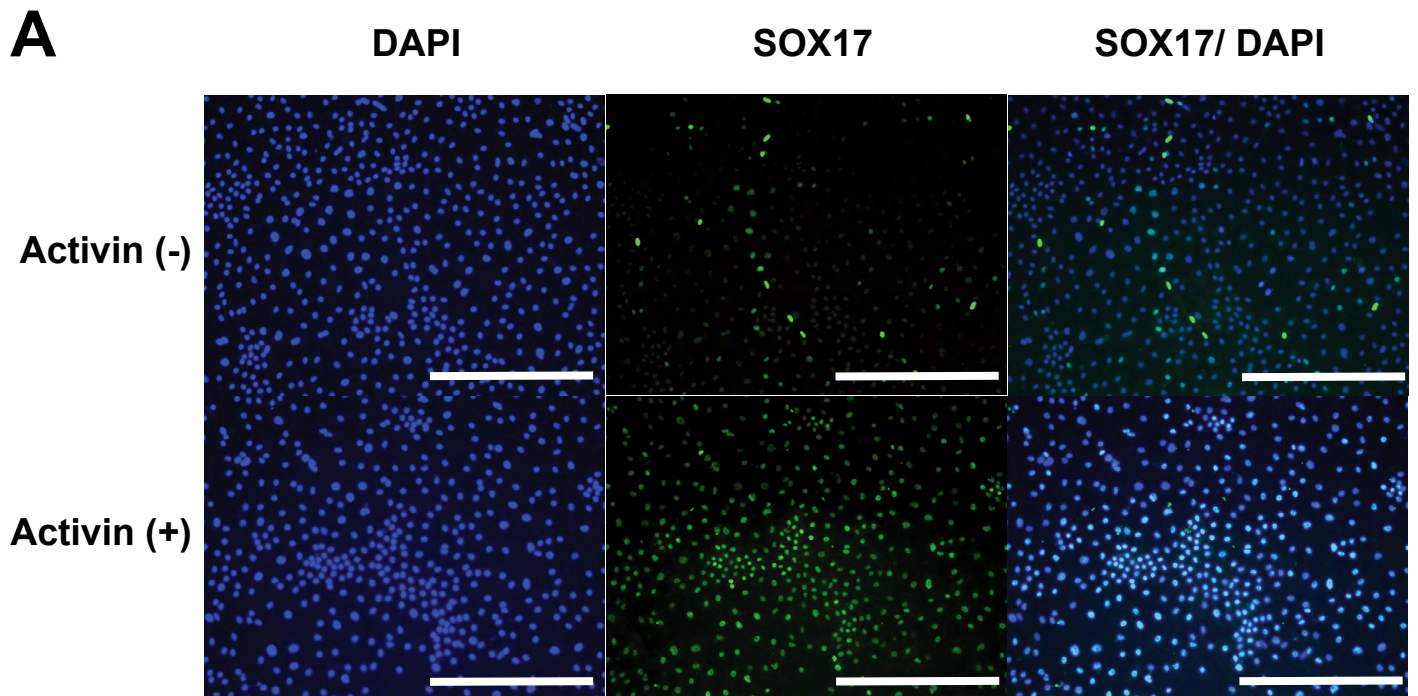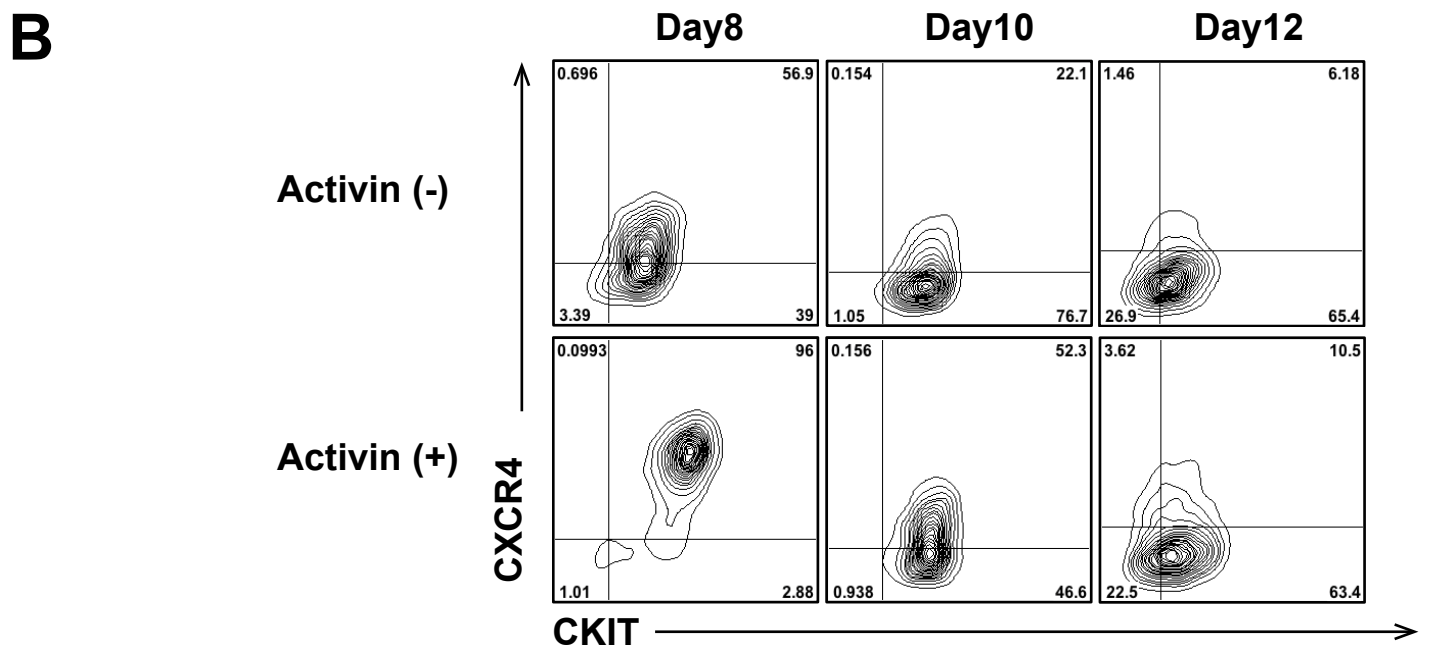

**Fig. S3. Duration of nodal/activin signaling impacts hepatic development.** (A) Immunostaining analyses showing the proportion of SOX17-positive cells in populations generated from non-treated (day 10) and activin-treated (day 12) endoderm. Sox17 is visualized with Alexa 488 (green), nuclei are stained with DAPI (blue). Scale bar: 200  $\mu$ m. (B) Flow cytometric analysis showing the proportion of CXCR4- and KIT-positive cells in populations at days 8, 10 and 12 of culture generated from non-treated cell and activin-treated endoderm

**A**

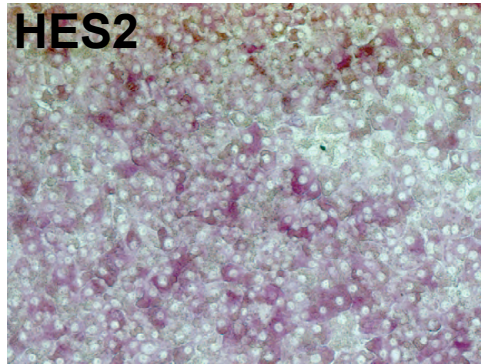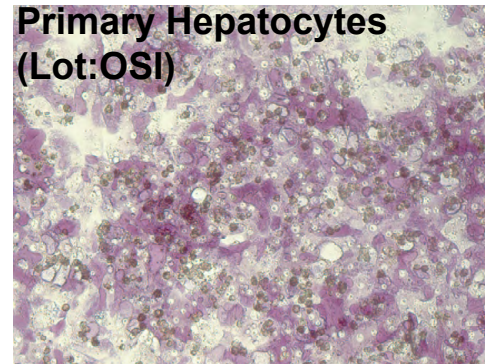

**B**

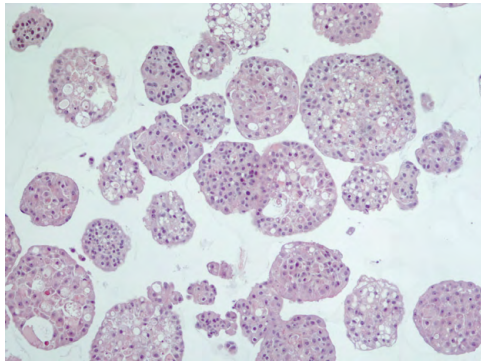

**C**

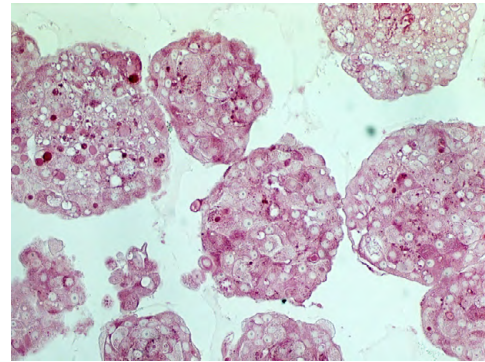

**Fig. S4. Periodic acid-Schiff (PAS) staining showing the intracellular storage of glycogen. (A) Left: HES2-derived hepatic cells at day 26 of monolayer culture. Right: cryopreserved human hepatocytes (lot OSI) (B) Hematoxylin and Eosin staining of HES2-derived aggregates at day 32. (C) PAS staining of HES2-derived aggregates at day 32.**

**A**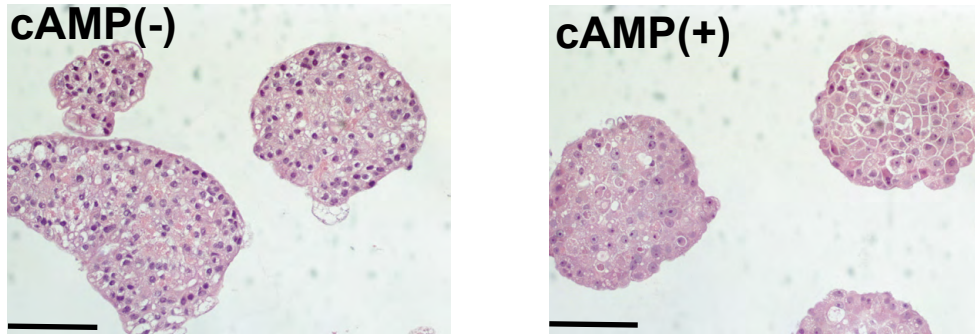**B**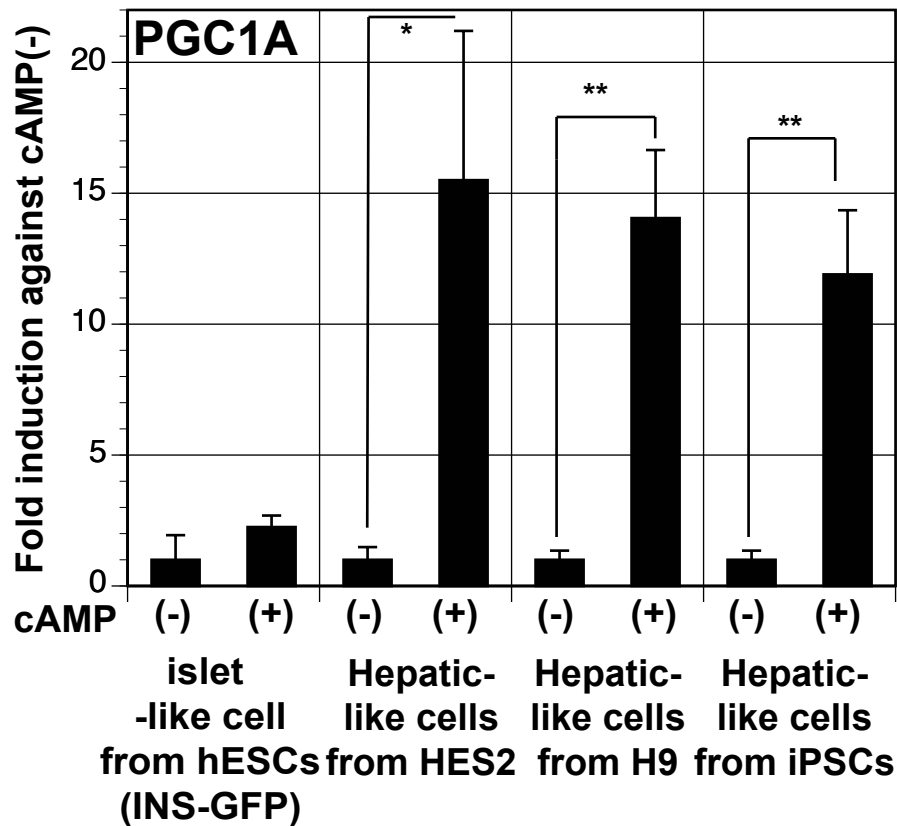

**Fig. S5. cAMP signaling induces maturation of hESC-derived hepatocyte-like cells.** (A) Hematoxylin and eosin staining of 8-Br-cAMP-treated and non-treated HES2-derived aggregates at day 44. (B) RT-qPCR analysis of *PGC1- $\alpha$*  expression in cAMP-treated pancreatic aggregates and hepatic aggregates generated from HES2, H9 and 38-2 cells. Values are determined relative to *TBP* and presented as fold change relative to expression in non-treated cells, which is set as 1. Bars represent the s.d. of the mean of three independent experiments, \* $P < 0.05$ , \*\* $P < 0.01$ , \*\*\* $P < 0.001$ , Student's *t*-test.

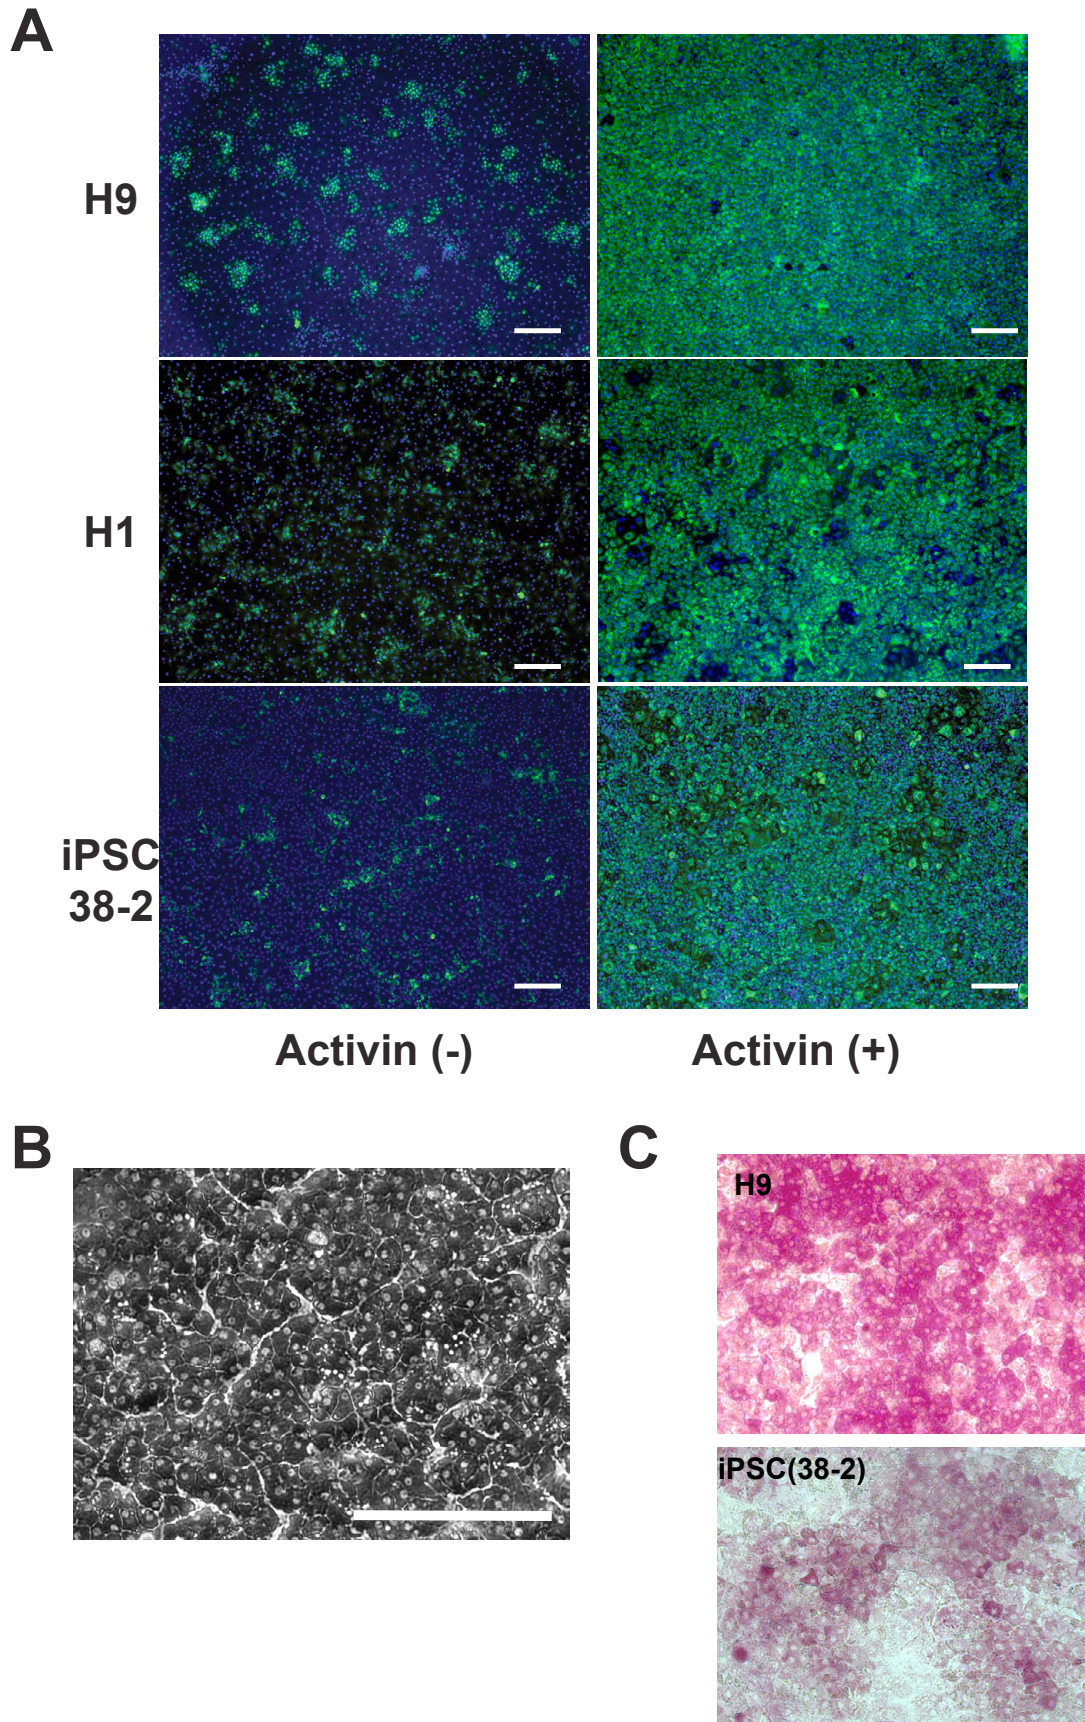

**Fig. S6. Hepatic specification and maturation from other hPSC lines.** (A) Immunostaining analyses showing proportion of ALB-positive cells in cultures generated from activin-treated (day 26-28) and non-treated (day 24) endoderm derived from H9 hESCs, H1 hESCs and 38-2 hiPSCs. ALB is visualized with Alexa 488 (green), nuclei are stained with DAPI (blue). Scale bar: 200  $\mu$ m. (B) Phase-contrast image showing morphology of H9-derived hepatic cells at day 26 of culture. Scale bar: 200  $\mu$ m. (C) PAS staining of H9 hESC- and 38-2 iPSC-derived hepatic cells at day 26.

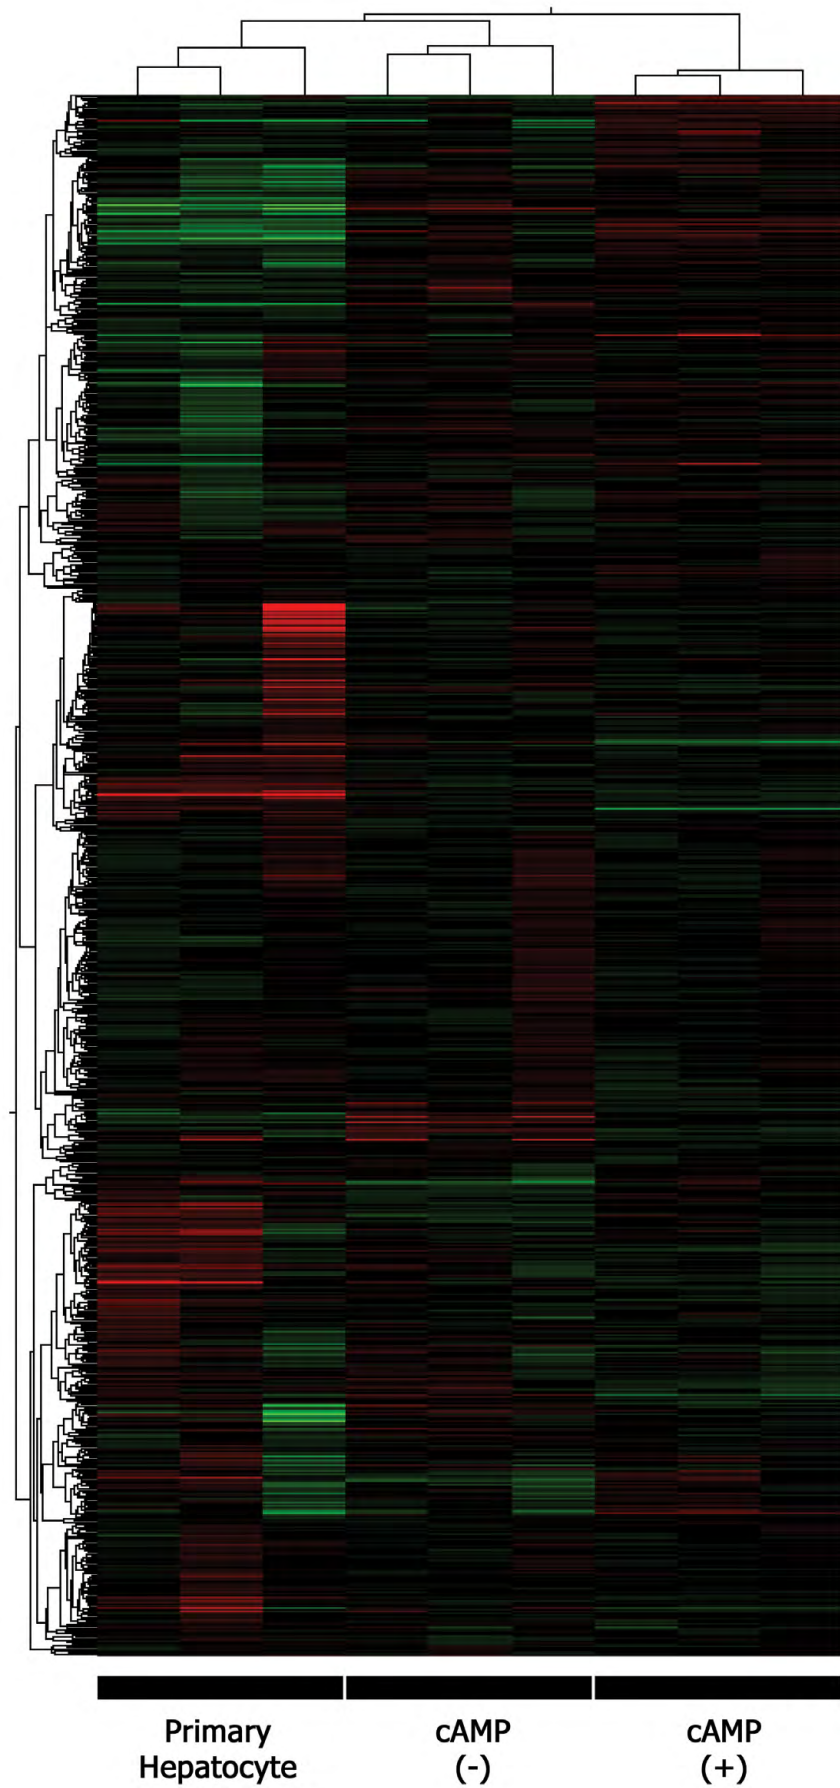

**Fig. S7. Heat map summarizing expression of 23038 filtered transcripts, showing the results of a two-way unsupervised hierarchical cluster analysis.** Degree of intensity for red and green colors represents the relative amounts of over or underexpression, respectively, compared with median (black) for each transcript.

**Table S1. Hepatic specification and maturation from other hPSC cell lines****Hepatic specification and maturation of H9 cells**

| Culture periods | Based medium                                     | Growth factors and cytokines                   |
|-----------------|--------------------------------------------------|------------------------------------------------|
| Day 8-day 14    | H16 DMEM                                         | bFGF (40 ng/ml), BMP4 (50 ng/ml)               |
| Day 14-day 20   | H16 DMEM plus 25% Ham's F12 and 0.1% BSA         | HGF (20 ng/ml), Dex (40 ng/ml), OSM (20ng/ml)  |
| Day 20-day 32   | H21 DMEM plus 25% Ham's F12 and 0.1% BSA         | HGF (20 ng/ml), Dex (40 ng/ml), OSM (20 ng/ml) |
| Day 32-day 44   | Hepatocyte culture medium (HCM) (Lonza: CC-4182) | $\pm$ 1 mM 8-bromo-cAMP (Biolab:B007)          |

**Hepatic specification and maturation of H1 and iPS (38-2) cells**

| Culture periods | Based medium                                     | Growth factors and cytokines                   |
|-----------------|--------------------------------------------------|------------------------------------------------|
| Day 10-day 16   | H16 DMEM                                         | bFGF (40 ng/ml), BMP4 (50 ng/ml)               |
| Day 16-day 22   | H16 DMEM plus 25% Ham's F12 and 0.1% BSA         | HGF (20 ng/ml), Dex (40 ng/ml), OSM (20 ng/ml) |
| Day 22-day 32   | H21 DMEM plus 25% Ham's F12 and 0.1% BSA         | HGF (20 ng/ml), Dex (40 ng/ml), OSM (20 ng/ml) |
| Day 32-day 44   | Hepatocyte culture medium (HCM) (Lonza: CC-4182) | $\pm$ 1 mM 8-bromo-cAMP (Biolab:B007)          |



**Table S2. Gene Ontology (GO) analysis**  
Significantly enriched Gene Ontology (GO) terms upregulated in cAMP(+) lines

| GO ID | GO ACCESSION                       | GO Term                                                                                        | p-value       | corrected p-value | Count in Selection | % Count in Selection | Count in Total | % Count in Total |
|-------|------------------------------------|------------------------------------------------------------------------------------------------|---------------|-------------------|--------------------|----------------------|----------------|------------------|
| 3962  | GO:0005737                         | cytoplasm                                                                                      | 6.558086E-5   | 0.018937081       | 48                 | 88.88885             | 7926           | 44.38844         |
| 7176  | GO:0009987(GO:0008151)(GO:0050875) | cellular process                                                                               | 3.710204E-4   | 0.06418881        | 24                 | 44.44443             | 10864          | 60.842293        |
| 20307 | GO:0044444                         | cytoplasmic part                                                                               | 5.3280417E-7  | 3.769804E-4       | 23                 | 42.92584             | 5338           | 29.894712        |
| 3963  | GO:0005739                         | mitochondrion                                                                                  | 1.137161E-8   | 7.151987E-4       | 20                 | 37.037037            | 1157           | 6.4796147        |
| 20156 | GO:0044237                         | cellular metabolic process                                                                     | 3.742244E-4   | 0.06418881        | 20                 | 37.037037            | 8902           | 38.09364         |
| 4255  | GO:0006082                         | organic acid metabolic process                                                                 | 2.2573053E-19 | 8.518051E-16      | 19                 | 35.185184            | 621            | 3.4778225        |
| 11694 | GO:0019752                         | carboxylic acid metabolic process                                                              | 1.6723905E-19 | 8.518051E-16      | 19                 | 35.185184            | 614            | 3.43862          |
| 18201 | GO:0034180                         | cellular ketone metabolic process                                                              | 3.0354533E-16 | 8.5903236E-16     | 19                 | 35.185184            | 523            | 3.5170225        |
| 19372 | GO:0043436                         | oxoacid metabolic process                                                                      | 1.6723905E-19 | 8.518051E-16      | 19                 | 35.185184            | 614            | 3.43862          |
| 20200 | GO:0044281                         | small molecule metabolic process                                                               | 9.6049245E-12 | 1.8122323E-8      | 19                 | 35.185184            | 2093           | 11.72155         |
| 2603  | GO:0003824                         | catalytic activity                                                                             | 1.0261457E-4  | 0.02662119        | 17                 | 31.481482            | 5422           | 30.365143        |
| 4696  | GO:0006629                         | lipid metabolic process                                                                        | 2.2636404E-9  | 2.8473262E-6      | 17                 | 31.481482            | 879            | 4.922715         |
| 15224 | GO:0032787                         | monocarboxylic acid metabolic process                                                          | 2.4227023E-15 | 6.489315E-12      | 15                 | 27.777778            | 322            | 1.8033154        |
| 4697  | GO:0006631                         | fatty acid metabolic process                                                                   | 4.5773118E-11 | 7.402598E-8       | 11                 | 20.37037             | 209            | 1.1704749        |
| 20174 | GO:0044255                         | cellular lipid metabolic process                                                               | 6.67601E-10   | 9.4470914E-7      | 11                 | 20.37037             | 581            | 3.2538083        |
| 26607 | GO:0055114                         | oxidation reduction                                                                            | 1.2482255E-4  | 0.030065356       | 11                 | 20.37037             | 658            | 3.685036         |
| 3997  | GO:0005777(GO:0019818)             | peroxisome                                                                                     | 1.3808894E-6  | 7.8162795E-4      | 7                  | 12.962963            | 109            | 0.1043906        |
| 18575 | GO:0042370                         | microbody                                                                                      | 1.3808894E-6  | 7.825E-4          | 7                  | 12.962963            | 109            | 0.1043906        |
| 3980  | GO:0005759                         | mitochondrial matrix                                                                           | 2.3700214E-4  | 0.043983888       | 6                  | 11.111111            | 242            | 1.352867         |
| 4181  | GO:0006006                         | glycine metabolic process                                                                      | 1.5651867E-4  | 0.031640932       | 6                  | 11.111111            | 158            | 0.8848564        |
| 6371  | GO:0009056                         | catabolic process                                                                              | 1.984098E-4   | 0.03941785        | 6                  | 11.111111            | 1919           | 10.7407785       |
| 9242  | GO:0016042(GO:0006874)             | lipid catabolic process                                                                        | 4.8472257E-6  | 0.02429426        | 6                  | 11.111111            | 186            | 1.0416666        |
| 11287 | GO:0019318                         | hexose metabolic process                                                                       | 5.255418E-4   | 0.08008407        | 6                  | 11.111111            | 198            | 1.108871         |
| 14422 | GO:0031980                         | mitochondrial lumen                                                                            | 2.3700214E-4  | 0.043983888       | 6                  | 11.111111            | 242            | 1.352867         |
| 20292 | GO:0044429                         | mitochondrial part                                                                             | 6.0606044E-6  | 0.002928196       | 6                  | 11.111111            | 661            | 3.7018388        |
| 11362 | GO:0019396                         | fatty acid oxidation                                                                           | 7.766657E-8   | 6.763351E-5       | 5                  | 9.259259             | 43             | 0.24081542       |
| 12938 | GO:0032259                         | lipid modification                                                                             | 1.6807688E-5  | 0.0097954065      | 5                  | 9.259259             | 106            | 0.593638         |
| 16857 | GO:0034440                         | lipid oxidation                                                                                | 7.766657E-8   | 6.763351E-5       | 5                  | 9.259259             | 43             | 0.24081542       |
| 20202 | GO:0044283                         | small molecule biosynthetic process                                                            | 1.8157081E-5  | 0.008851662       | 5                  | 9.259259             | 451            | 2.5257816        |
| 4261  | GO:0006900(GO:0006087)             | pyruvate metabolic process                                                                     | 6.891167E-5   | 0.018937081       | 4                  | 7.4074073            | 43             | 0.24081542       |
| 4262  | GO:0006901                         | generation of precursor metabolites and energy                                                 | 1.2851076E-5  | 0.005595479       | 4                  | 7.4074073            | 280            | 1.5681003        |
| 4263  | GO:0006900                         | glucogenesis                                                                                   | 6.203296E-6   | 0.002928196       | 4                  | 7.4074073            | 24             | 0.13440861       |
| 4589  | GO:0006519                         | cellular amino acid and derivative metabolic process                                           | 2.7302689E-5  | 0.009658876       | 4                  | 7.4074073            | 308            | 1.7249104        |
| 4590  | GO:0006520                         | cellular amino acid metabolic process                                                          | 5.5848763E-5  | 0.017087676       | 4                  | 7.4074073            | 261            | 1.4616935        |
| 4700  | GO:0006635                         | fatty acid beta-oxidation                                                                      | 1.7875504E-5  | 0.008851662       | 4                  | 7.4074073            | 31             | 0.1736111        |
| 4911  | GO:0008387(GO:0016194)(GO:0016195) | axocytosis                                                                                     | 4.8270303E-4  | 0.07591444        | 4                  | 7.4074073            | 126            | 0.70564514       |
| 6377  | GO:0009062                         | fatty acid catabolic process                                                                   | 1.7855429E-6  | 9.479923E-4       | 4                  | 7.4074073            | 40             | 0.2241434        |
| 6379  | GO:0009064                         | glutamine family amino acid metabolic process                                                  | 1.0452608E-5  | 0.004733211       | 4                  | 7.4074073            | 57             | 0.31922042       |
| 9254  | GO:0016054                         | organic acid catabolic process                                                                 | 1.565747E-8   | 1.6113878E-5      | 4                  | 7.4074073            | 126            | 0.70564514       |
| 11288 | GO:0019319                         | hexose biosynthetic process                                                                    | 1.5629736E-5  | 0.006553285       | 4                  | 7.4074073            | 30             | 0.16801076       |
| 11052 | GO:0034637                         | cellular carbohydrate biosynthetic process                                                     | 4.4716681E-4  | 0.074542749       | 4                  | 7.4074073            | 70             | 0.39220508       |
| 20025 | GO:0044106                         | cellular amine metabolic process                                                               | 4.3171964E-4  | 0.072945446       | 4                  | 7.4074073            | 352            | 1.9713261        |
| 20161 | GO:0044242                         | cellular lipid catabolic process                                                               | 7.3200616E-5  | 0.020211663       | 4                  | 7.4074073            | 85             | 0.47603047       |
| 20167 | GO:0044248                         | cellular catabolic process                                                                     | 8.693695E-5   | 0.02343283        | 4                  | 7.4074073            | 1882           | 9.419903         |
| 21400 | GO:0046165                         | alcohol biosynthetic process                                                                   | 1.034687E-4   | 0.02662119        | 4                  | 7.4074073            | 48             | 0.26881722       |
| 21568 | GO:0046364                         | monosaccharide biosynthetic process                                                            | 3.2819313E-5  | 0.01125686        | 4                  | 7.4074073            | 38             | 0.2018129        |
| 21596 | GO:0046395                         | carboxylic acid catabolic process                                                              | 1.565747E-8   | 1.6113878E-5      | 4                  | 7.4074073            | 126            | 0.70564514       |
| 30    | GO:0000038                         | very long-chain fatty acid metabolic process                                                   | 2.1062282E-4  | 0.040413324       | 3                  | 5.5555553            | 23             | 0.12880825       |
| 3799  | GO:0005496                         | steroid binding                                                                                | 4.7255788E-4  | 0.07642371        | 3                  | 5.5555553            | 71             | 0.39762545       |
| 4611  | GO:0006444                         | glutamine metabolic process                                                                    | 1.3708798E-4  | 0.031514384       | 3                  | 5.5555553            | 20             | 0.11200717       |
| 4702  | GO:0006637                         | acyl-CoA metabolic process                                                                     | 4.4752804E-5  | 0.01447516        | 3                  | 5.5555553            | 14             | 0.078405015      |
| 4791  | GO:0006732(GO:0006752)             | coenzyme metabolic process                                                                     | 1.2436652E-7  | 9.386061E-5       | 3                  | 5.5555553            | 160            | 0.89605737       |
| 9441  | GO:0016289                         | CoA hydrolase activity                                                                         | 5.5734665E-5  | 0.017087676       | 3                  | 5.5555553            | 15             | 0.08405038       |
| 9443  | GO:0016291(GO:0008778)(GO:0016292) | acyl-CoA thioesterase activity                                                                 | 2.0512542E-5  | 0.007490813       | 3                  | 5.5555553            | 11             | 0.06160394       |
| 15931 | GO:0033500                         | steroid catabolic process                                                                      | 1.5271563E-4  | 0.031514384       | 3                  | 5.5555553            | 53             | 0.296819         |
| 17785 | GO:0035833                         | thioester metabolic process                                                                    | 4.4752804E-5  | 0.01447516        | 3                  | 5.5555553            | 14             | 0.078405015      |
| 18588 | GO:0042593                         | glucose homeostasis                                                                            | 1.5271563E-4  | 0.031514384       | 3                  | 5.5555553            | 53             | 0.296819         |
| 25157 | GO:0051186                         | cofactor metabolic process                                                                     | 1.00181786E-7 | 8.1008744E-5      | 3                  | 5.5555553            | 207            | 1.1592742        |
| 4606  | GO:0006536                         | glutamate metabolic process                                                                    | 1.3708798E-4  | 0.031514384       | 2                  | 3.7037036            | 20             | 0.11200717       |
| 4768  | GO:0006708                         | steroid catabolic process                                                                      | 1.962282E-4   | 0.040413324       | 2                  | 3.7037036            | 23             | 0.12880825       |
| 9196  | GO:0015980                         | energy derivation by oxidation of organic compounds                                            | 6.395557E-7   | 4.293311E-4       | 2                  | 3.7037036            | 142            | 0.7925209        |
| 9442  | GO:0016290(GO:0016293)             | palmitoyl-CoA hydrolase activity                                                               | 5.3056213E-4  | 0.08008407        | 2                  | 3.7037036            | 7              | 0.039202508      |
| 15370 | GO:0032934(GO:0005498)             | steroid binding                                                                                | 2.7152587E-4  | 0.048791237       | 2                  | 3.7037036            | 25             | 0.14000896       |
| 15971 | GO:0033540                         | fatty acid beta-oxidation using acyl-CoA oxidase                                               | 5.3056213E-4  | 0.08008407        | 2                  | 3.7037036            | 7              | 0.039202508      |
| 16120 | GO:0033695                         | oxalotransferase activity, acting on CH or CH2 groups, quinone or similar compound as acceptor | 1.5310886E-4  | 0.031514384       | 2                  | 3.7037036            | 4              | 0.02241433       |
| 17290 | GO:0034875                         | caffeine oxidation                                                                             | 1.5310886E-4  | 0.031514384       | 2                  | 3.7037036            | 4              | 0.02241433       |
| 20612 | GO:0045333                         | cellular respiration                                                                           | 1.18166370E-4 | 0.02908086        | 2                  | 3.7037036            | 94             | 0.5264337        |

Significantly enriched Gene Ontology (GO) terms up-regulated in the hepatocytes

| GO ID | GO ACCESSION                       | GO Term                                                                | p-value       | corrected p-value | Count in Selection | % Count in Selection | Count in Total | % Count in Total |
|-------|------------------------------------|------------------------------------------------------------------------|---------------|-------------------|--------------------|----------------------|----------------|------------------|
| 1562  | GO:0002376                         | immune system process                                                  | 3.677121E-12  | 6.5012102E-9      | 28                 | 68.29269             | 1034           | 5.7907705        |
| 4964  | GO:0006955                         | immune response                                                        | 1.4757004E-12 | 3.0651428E-9      | 28                 | 68.29269             | 670            | 3.7522402        |
| 4080  | GO:0005887                         | integral to plasma membrane                                            | 1.14432696E-4 | 0.08318992        | 22                 | 53.658535            | 1257           | 7.0396504        |
| 20282 | GO:0044419                         | interspecies interaction between organisms                             | 7.3517453E-10 | 1.1876774E-6      | 17                 | 41.463413            | 348            | 1.9489248        |
| 25661 | GO:0051704(GO:0051706)             | multi-organism process                                                 | 1.3370409E-7  | 1.9439956E-4      | 17                 | 41.463413            | 781            | 4.37388          |
| 4961  | GO:0006952(GO:0002217)(GO:0042829) | defense response                                                       | 1.1787167E-6  | 0.02326235        | 12                 | 29.268293            | 644            | 3.6063308        |
| 11793 | GO:0019882(GO:0030333)             | antigen processing and presentation                                    | 1.033701E-15  | 3.7573833E-12     | 12                 | 29.268293            | 73             | 0.40882617       |
| 1660  | GO:0002474                         | antigen processing and presentation of peptide antigen via MHC class I | 1.875959E-20  | 2.7275575E-16     | 11                 | 26.829268            | 28             | 0.15681003       |
| 18603 | GO:0042611                         | MHC protein complex                                                    | 2.2178988E-15 | 6.449443E-12      | 11                 | 26.829268            | 46             | 0.2576165        |
| 18604 | GO:0042612                         | MHC class I protein complex                                            | 4.479748E-16  | 2.171153E-12      | 11                 | 26.829268            | 30             | 0.1680176        |
| 23156 | GO:0048002                         | antigen processing and presentation of peptide antigen                 | 1.6743372E-18 | 1.2127044E-14     | 11                 | 26.829268            | 37             | 0.20721327       |
| 14832 | GO:0032393                         | MHC class I receptor activity                                          | 3.54134E-15   | 8.581574E-12      | 10                 | 24.390244            | 25             | 0.14000896       |
| 14345 | GO:0031901                         | early endosome membrane                                                | 8.606433E-5   | 0.07360797        | 5                  | 12.195122            | 54             | 0.30241936       |
| 1439  | GO:0002253                         | activation of immune response                                          | 2.4822812E-5  | 0.027752476       | 4                  | 9.756098             | 103            | 0.57683694       |
| 1641  | GO:0002455                         | humoral immune response mediated by circulating immunoglobulin         | 1.2295373E-4  | 0.085128106       | 4                  | 9.756098             | 31             | 0.1736111        |
| 1712  | GO:0002526                         | acute inflammatory response                                            | 8.180872E-6   | 0.009912174       | 4                  | 9.756098             | 87             | 0.482312         |
| 4967  | GO:0006958                         | complement activation, classical pathway                               | 9.402098E-5   | 0.07594564        | 4                  | 9.756098             | 29             | 0.1624104        |
| 24757 | GO:0050778                         | positive regulation of immune response                                 | 4.3423148E-5  | 0.045096606       | 4                  | 9.756098             | 153            | 0.85685486       |
| 24045 | GO:0005051                         | leukotriene-B4 20-monooxygenase activity                               | 6.91678E-5    | 0.06285423        | 2                  | 4.878049             | 2              | 0.011200717      |

Gene Ontology (GO) analysis showing the gene transcripts in cAMP-induced cells (green) and primary hepatocyte (purple) from Table S9 (Fig. 7A). The cluster showing enhanced expression in the cAMP(+) treated cells is enriched for genes related to liver function. The cluster expressed at the highest level in the primary hepatocytes contains immune system, inflammatory and MHC genes.

# Table S3. Phase I drug metabolism enzyme

## cAMP(+) versus primary hepatocyte

| Gene Symbol           | Affymetrix ID | Fold Change | cAMP(+) versus hepatocyte | Direction of fold change | Corrected p-value | p-value     | Significant in post-hoc Tukey (P<0.1) |
|-----------------------|---------------|-------------|---------------------------|--------------------------|-------------------|-------------|---------------------------------------|
| CYP1A1                | 7990391       | 46.071194   | up                        | up                       | 0.012067234       | 0.00334378  | *                                     |
| CYP3A7                | 8141342       | 21.097319   | up                        | up                       | 0.017114632       | 0.0059243   | *                                     |
| CYP2C8 CYP2C19        | 7935169       | 16.09552    | up                        | up                       | 0.012067234       | 0.00241581  | *                                     |
| CYP2E1                | 7931643       | 9.311104    | down                      | down                     | 0.012067234       | 0.00289097  | *                                     |
| CYP7A1                | 8150920       | 9.042042    | up                        | up                       | 0.012067234       | 0.00305444  | *                                     |
| FMO3                  | 7907249       | 5.937933    | down                      | down                     | 0.012067234       | 0.003713    | *                                     |
| CYP1A2                | 7984862       | 5.2238216   | up                        | up                       | 0.012067234       | 9.765099E-4 | *                                     |
| CYP3A4                | 8141317       | 3.6115234   | up                        | up                       | 0.012067234       | 0.00104858  | *                                     |
| CYP8B1                | 8086457       | 2.8518157   | up                        | up                       | 0.012067234       | 0.0037024   | *                                     |
| CYP2C19               | 7929478       | 2.6333666   | up                        | up                       | 0.5220973         | 0.48193598  |                                       |
| CYP3A5                | 8141328       | 2.5988102   | up                        | up                       | 0.110070765       | 0.06350236  |                                       |
| CYP2C18               | 7929466       | 2.417497    | up                        | up                       | 0.20925228        | 0.15291514  |                                       |
| CYP1B1                | 8051583       | 2.1679187   | up                        | up                       | 0.1742982         | 0.12066799  |                                       |
| FMO5                  | 7919314       | 2.101705    | up                        | up                       | 0.121317275       | 0.07465679  |                                       |
| ADH4                  | 8101852       | 1.9780805   | down                      | down                     | 0.01808588        | 0.00695611  | *                                     |
| CYP7B1                | 8151056       | 1.4362873   | up                        | up                       | 0.08954843        | 0.04477422  | *                                     |
| CYP2B6                | 8028963       | 1.4358941   | up                        | up                       | 0.071706966       | 0.03309552  | *                                     |
| ADH6                  | 8101862       | 1.3970135   | up                        | up                       | 0.095975235       | 0.05167897  | *                                     |
| CYP2C9                | 7929487       | 1.3147879   | up                        | up                       | 0.4188202         | 0.35438633  |                                       |
| ALDH2                 | 7958784       | 1.1899356   | down                      | down                     | 0.06618735        | 0.02800234  | *                                     |
| CYP2D6                | 8076424       | 1.1894984   | up                        | up                       | 0.34041327        | 0.2749492   |                                       |
| ADH1B                 | 8101881       | 1.176147    | up                        | up                       | 0.1742982         | 0.11466285  | *                                     |
| ADH1C                 | 8101893       | 1.1680543   | down                      | down                     | 0.6280842         | 0.6039271   |                                       |
| CYP2A13 CYP2A6 CYP2A7 | 8028973       | 1.0301366   | down                      | down                     | 0.2404887         | 0.1849913   | *                                     |
| ADH1A                 | 8101874       | 1.0277959   | down                      | down                     | 0.4814003         | 0.42585412  |                                       |
| FMO4                  | 7907297       | 1.0077161   | down                      | down                     | 0.8514573         | 0.8514573   |                                       |

## cAMP(+) versus cAMP (-)

| Gene Symbol           | Affymetrix ID | Fold change | cAMP(+) versus | Direction of fold change | p-value     | Corrected p-value | Significant in post-hoc Tukey (P<0.1) |
|-----------------------|---------------|-------------|----------------|--------------------------|-------------|-------------------|---------------------------------------|
| CYP2C8 CYP2C19        | 7935169       | 17.61894    | up             | up                       | 0.012067234 | 0.002415811       | *                                     |
| CYP8B1                | 8086457       | 9.690104    | up             | up                       | 0.012067234 | 0.0037024         | *                                     |
| CYP7A1                | 8150920       | 8.396973    | up             | up                       | 0.012067234 | 0.003054444       | *                                     |
| CYP3A4                | 8141317       | 5.700867    | up             | up                       | 0.012067234 | 0.001048583       | *                                     |
| CYP1A2                | 7984862       | 5.6071825   | up             | up                       | 0.012067234 | 9.765099E-4       | *                                     |
| ADH1B                 | 8101881       | 4.874928    | up             | up                       | 0.1742982   | 0.11466285        | *                                     |
| CYP2B6                | 8028963       | 4.513215    | up             | up                       | 0.071706966 | 0.033095524       | *                                     |
| CYP1A1                | 7990391       | 3.9629219   | up             | up                       | 0.012067234 | 0.003343782       | *                                     |
| CYP1B1                | 8051583       | 3.9326298   | up             | up                       | 0.1742982   | 0.12066799        | *                                     |
| CYP2C9                | 7929487       | 2.832749    | up             | up                       | 0.4188202   | 0.35438633        |                                       |
| CYP2C18               | 7929466       | 2.1275349   | up             | up                       | 0.20925228  | 0.15291514        |                                       |
| ADH1A                 | 8101874       | 2.0610342   | up             | up                       | 0.4814003   | 0.42585412        |                                       |
| FMO5                  | 7919314       | 1.9418982   | up             | up                       | 0.121317275 | 0.074656785       |                                       |
| CYP3A7                | 8141342       | 1.670188    | up             | up                       | 0.017114632 | 0.005924296       | *                                     |
| CYP3A5                | 8141328       | 1.5908221   | up             | up                       | 0.110070765 | 0.063502364       | *                                     |
| CYP2D6                | 8076424       | 1.4976844   | up             | up                       | 0.34041327  | 0.2749492         |                                       |
| ADH6                  | 8101862       | 1.4162867   | down           | down                     | 0.095975235 | 0.051678974       | *                                     |
| CYP2A13 CYP2A6 CYP2A7 | 8028973       | 1.3861729   | up             | up                       | 0.2404887   | 0.1849913         | *                                     |
| ADH1C                 | 8101893       | 1.3693517   | up             | up                       | 0.6280842   | 0.6039271         |                                       |
| CYP2C19               | 7929478       | 1.3029042   | up             | up                       | 0.5220973   | 0.48193598        |                                       |
| ALDH2                 | 7958784       | 1.2843883   | up             | up                       | 0.06618735  | 0.028002342       | *                                     |
| CYP7B1                | 8151056       | 1.1916578   | up             | up                       | 0.08954843  | 0.044774216       | *                                     |
| ADH4                  | 8101852       | 1.1621644   | down           | down                     | 0.01808588  | 0.006956108       | *                                     |
| CYP2E1                | 7931643       | 1.1376745   | up             | up                       | 0.012067234 | 0.002890972       | *                                     |
| FMO4                  | 7907297       | 1.1074113   | down           | down                     | 0.8514573   | 0.8514573         |                                       |
| FMO3                  | 7907249       | 1.027153    | up             | up                       | 0.012067234 | 0.003712995       | *                                     |

A comparison of expression levels of a selected group of Phase I drug metabolism genes between cAMP-treated hepatocyte-like cells and primary hepatocytes (blue) and between cAMP-treated and non-treated hepatocyte-like cells (green).

# Table S4. Phase II drug metabolism enzyme

## cAMP(+) versus primary hepatocyte

| Gene Symbol                                                     | Affymetrix ID | Fold Change | cAMP(+) VS Hepatocyte | Direction of Fold Change | Corrected p-value | p-value     | Significant in Post-hoc Tukey (p<.1) |
|-----------------------------------------------------------------|---------------|-------------|-----------------------|--------------------------|-------------------|-------------|--------------------------------------|
| GSTA2                                                           | 8127065       | 8.09758     | up                    | up                       | 0.045971643       | 0.0204318   | *                                    |
| SULT2A1                                                         | 8037949       | 4.501422    | up                    | up                       | 0.008581583       | 0.0012713   | *                                    |
| EPHX1                                                           | 7910111       | 4.0225717   | up                    | up                       | 0.012243672       | 0.0022673   | *                                    |
| CES1                                                            | 8001457       | 3.9624193   | down                  | down                     | 7.7732874E-4      | 8.636986E-5 | *                                    |
| EPHX2                                                           | 8145532       | 3.5328372   | up                    | up                       | 0.016735837       | 0.0050373   | *                                    |
| UGT2B7                                                          | 8095395       | 3.345876    | up                    | up                       | 0.1260292         | 0.0793522   | *                                    |
| GSTA1                                                           | 8127072       | 2.7610693   | up                    | up                       | 0.47513044        | 0.4223382   | *                                    |
| UGT2B7                                                          | 8100758       | 2.7340186   | up                    | up                       | 0.23812853        | 0.1763915   | *                                    |
| UGT2A3                                                          | 8100760       | 2.3408983   | up                    | up                       | 0.1260292         | 0.0792332   | *                                    |
| GSTM2 GSTM4                                                     | 7903753       | 2.218478    | up                    | up                       | 0.016735837       | 0.0061985   | *                                    |
| UGT3A1                                                          | 8111512       | 1.8036636   | down                  | down                     | 0.10196026        | 0.0566446   | *                                    |
| NAT2                                                            | 8144866       | 1.7318547   | down                  | down                     | 9.925069E-6       | 8759516E-   | *                                    |
| SULT1E1                                                         | 8100808       | 1.4051794   | up                    | up                       | 8.63045E-5        | .3929256E-  | *                                    |
| SULT1A3 GIYD1 GIYD2 SULT1A2 SULT1A4                             | 7994582       | 1.4016013   | up                    | up                       | 0.22789103        | 0.1603678   | *                                    |
| UGT1A1 UGT1A6 UGT1A10 UGT1A9 UGT1A4 UGT1A3 UGT1A5 UGT1A7 UGT1A8 | 8049349       | 1.4001894   | up                    | up                       | 0.016735837       | 0.0050807   | *                                    |
| UGT2B4                                                          | 8100784       | 1.3852446   | up                    | up                       | 0.016735837       | 0.0059566   | *                                    |
| SULT1A2                                                         | 8000582       | 1.3303971   | down                  | down                     | 0.59399104        | 0.5499917   | *                                    |
| UGT2B28                                                         | 8095404       | 1.3045363   | down                  | down                     | 0.07000782        | 0.0337075   | *                                    |
| GSTA3                                                           | 8127087       | 1.2955159   | up                    | up                       | 0.0954211         | 0.0494776   | *                                    |
| SULT1A1                                                         | 8000590       | 1.2795404   | down                  | down                     | 0.43535653        | 0.3708593   | *                                    |
| GSTK1                                                           | 8136849       | 1.2583706   | up                    | up                       | 0.03604819        | 0.0146863   | *                                    |
| CES2                                                            | 7996345       | 1.1977214   | up                    | up                       | 0.016735837       | 0.0052718   | *                                    |
| UGT2B17                                                         | 8100734       | 1.1170508   | up                    | up                       | 0.3367106         | 0.2743568   | *                                    |
| GSTM2                                                           | 7919578       | 1.1149895   | up                    | up                       | 0.22247058        | 0.1483137   | *                                    |
| GSTO1                                                           | 7930304       | 1.0659491   | up                    | up                       | 0.9567845         | 0.9567845   | *                                    |
| UGT2A1 UGT2A2                                                   | 8100791       | 1.0262581   | up                    | up                       | 0.3367106         | 0.2642122   | *                                    |

## cAMP(+) versus cAMP (-)

| Gene Symbol                                                     | Affymetrix ID | Fold Change | cAMP(+) VS cAMP(-) | Direction of Fold Change | p-value      | Corrected p-value | Significant in Post-hoc Tukey (p<.1) |
|-----------------------------------------------------------------|---------------|-------------|--------------------|--------------------------|--------------|-------------------|--------------------------------------|
| UGT1A1 UGT1A6 UGT1A10 UGT1A9 UGT1A4 UGT1A3 UGT1A5 UGT1A7 UGT1A8 | 8049349       | 9.1351      | up                 | up                       | 0.016735837  | 0.005080654       | *                                    |
| SULT2A1                                                         | 8037949       | 4.9485445   | up                 | up                       | 0.008581583  | 0.001271346       | *                                    |
| EPHX1                                                           | 7910111       | 4.8572507   | up                 | up                       | 0.012243672  | 0.002267347       | *                                    |
| CES1                                                            | 8001457       | 4.7324866   | down               | down                     | 7.7732874E-4 | 8.636986E-5       | *                                    |
| SULT1E1                                                         | 8100808       | 4.077046    | down               | down                     | 8.63045E-5   | 6.3929256E-6      | *                                    |
| GSTA1                                                           | 8127072       | 3.6004374   | up                 | up                       | 0.47513044   | 0.42233816        | *                                    |
| GSTA2                                                           | 8127065       | 3.5906198   | up                 | up                       | 0.045971643  | 0.02043184        | *                                    |
| UGT2B7                                                          | 8095395       | 3.5550961   | up                 | up                       | 0.1260292    | 0.0793522         | *                                    |
| UGT2B4                                                          | 8100784       | 3.4201937   | up                 | up                       | 0.016735837  | 0.005595609       | *                                    |
| CES2                                                            | 7996345       | 3.3923113   | up                 | up                       | 0.016735837  | 0.005271834       | *                                    |
| UGT2B7                                                          | 8100758       | 2.0410874   | up                 | up                       | 0.23812853   | 0.1763915         | *                                    |
| EPHX2                                                           | 8145532       | 2.0409768   | up                 | up                       | 0.016735837  | 0.005037259       | *                                    |
| UGT2A3                                                          | 8100760       | 1.3768438   | down               | down                     | 0.1260292    | 0.07923323        | *                                    |
| GSTA3                                                           | 8127087       | 1.3496046   | up                 | up                       | 0.0954211    | 0.049477607       | *                                    |
| SULT1A3 GIYD1 GIYD2 SULT1A2 SULT1A4                             | 7994582       | 1.2940637   | up                 | up                       | 0.22789103   | 0.16036776        | *                                    |
| GSTK1                                                           | 8136849       | 1.227205    | up                 | up                       | 0.03604819   | 0.0146863         | *                                    |
| SULT1A2                                                         | 8000582       | 1.1342998   | down               | down                     | 0.59399104   | 0.5499917         | *                                    |
| GSTO1                                                           | 7930304       | 1.064542    | up                 | up                       | 0.9567845    | 0.9567845         | *                                    |
| UGT2A1 UGT2A2                                                   | 8100791       | 1.0529388   | up                 | up                       | 0.3367106    | 0.2642122         | *                                    |
| NAT2                                                            | 8144866       | 1.0509216   | down               | down                     | 9.925069E-6  | 3.6759516E-7      | *                                    |
| UGT2B28                                                         | 8095404       | 1.0417112   | down               | down                     | 0.07000782   | 0.03370747        | *                                    |
| NAT1                                                            | 8144857       | 1.0342079   | down               | down                     | 0.7743908    | 0.74570966        | *                                    |
| UGT2B17                                                         | 8100734       | 1.0268425   | down               | down                     | 0.3367106    | 0.27435678        | *                                    |
| GSTM2 GSTM4                                                     | 7903753       | 1.0195614   | down               | down                     | 0.016735837  | 0.006198458       | *                                    |
| SULT1A1                                                         | 8000590       | 1.0132033   | down               | down                     | 0.43535653   | 0.37085927        | *                                    |
| UGT3A1                                                          | 8111512       | 1.0086902   | up                 | up                       | 0.10196026   | 0.056644585       | *                                    |
| GSTM2                                                           | 7919578       | 1.0031872   | up                 | up                       | 0.22247058   | 0.14831372        | *                                    |

# Transporters

## cAMP(+) versus primary hepatocyte

| Gene Symbol | Affymetrix ID | Fold Change | cAMP(+) VS Hepatocyte | Direction of Fold Change | Corrected p-value | p-value    | Significant in post-hoc Tukey (P<0.1) |
|-------------|---------------|-------------|-----------------------|--------------------------|-------------------|------------|---------------------------------------|
| ABCB1       | 8140782       | 5.399585    | down                  | down                     | 0.074096315       | 0.03554574 | *                                     |
| ABCB4       | 8140752       | 4.592113    | down                  | down                     | 0.01389056        | 0.00231509 | *                                     |
| ABCB11      | 8056583       | 3.9600024   | up                    | up                       | 0.01389056        | 0.00126014 | *                                     |
| SLCO1B1     | 7954356       | 3.4501076   | up                    | up                       | 0.036024522       | 0.00900613 | *                                     |
| SLC10A1     | 7979878       | 1.8501159   | down                  | down                     | 0.39103138        | 0.3258595  | *                                     |
| SLCO2B1     | 7942569       | 1.7992761   | up                    | up                       | 0.47115463        | 0.43488163 | *                                     |
| ABCC3       | 8008454       | 1.562891    | down                  | down                     | 0.074096315       | 0.03704816 | *                                     |
| ABCC2       | 7929779       | 1.5118597   | up                    | up                       | 0.07192941        | 0.02397647 | *                                     |
| SLC22A10    | 7940737       | 1.436169    | down                  | down                     | 0.47115463        | 0.47115463 | *                                     |
| SLCO1B3     | 7954344       | 1.2984133   | down                  | down                     | 0.12872237        | 0.07508805 | *                                     |
| SLC22A7     | 8119782       | 1.2072212   | up                    | up                       | 0.13624907        | 0.09083271 | *                                     |
| SLCO1A2     | 7961626       | 1.082006    | up                    | up                       | 0.16357224        | 0.12267918 | *                                     |

## cAMP(+) versus cAMP (-)

| Gene Symbol | Affymetrix ID | Fold change | cAMP(+) VS cAMP(-) | Direction of Fold Change | p-value   | Corrected p-value | Significant in post-hoc Tukey (P<0.1) |
|-------------|---------------|-------------|--------------------|--------------------------|-----------|-------------------|---------------------------------------|
| SLCO1B1     | 7954356       | 10.375665   | up                 | up                       | 0.0360245 | 0.009006131       | *                                     |
| ABCC2       | 7929779       | 3.5463655   | up                 | up                       | 0.0719294 | 0.023976471       | *                                     |
| ABCB11      | 8056583       | 2.6618686   | up                 | up                       | 0.0138906 | 0.001260135       | *                                     |
| SLCO2B1     | 7942569       | 1.8878269   | up                 | up                       | 0.4711546 | 0.43488163        | *                                     |
| SLC22A7     | 8119782       | 1.8327168   | up                 | up                       | 0.1362491 | 0.09083271        | *                                     |
| SLC10A1     | 7979878       | 1.3948876   | up                 | up                       | 0.3910314 | 0.3258595         | *                                     |
| ABCB4       | 8140752       | 1.1143088   | down               | down                     | 0.0138906 | 0.002315093       | *                                     |
| ABCB1       | 8140782       | 1.0972914   | down               | down                     | 0.0740963 | 0.035545744       | *                                     |
| ABCC3       | 8008454       | 1.0846786   | up                 | up                       | 0.0740963 | 0.037048157       | *                                     |
| SLCO1B3     | 7954344       | 1.052959    | up                 | up                       | 0.1287224 | 0.07508805        | *                                     |
| SLC22A10    | 7940737       | 1.0351869   | down               | down                     | 0.4711546 | 0.47115463        | *                                     |
| SLCO1A2     | 7961626       | 1.015178    | up                 | up                       | 0.1635722 | 0.12267918        | *                                     |

A comparison of expression levels of a selected group of Phase II drug metabolism and transporters genes between cAMP-treated hepatocyte-like cells and primary hepatocytes (blue) and between cAMP-treated and non-treated hepatocyte-like cells (green).

# Table S5. Expression levels of coagulation factors and apolipoproteins

## Coagulation factors

### cAMP(+) VS Primary Hepatocyte

| Gene Symbol | Affymetrix ID | Fold Change | cAMP(+) VS Hepatocyte | Direction of | Fold Change | Corrected p-value | p-value      | Significant in Post-hoc Tukey (p<.1) |
|-------------|---------------|-------------|-----------------------|--------------|-------------|-------------------|--------------|--------------------------------------|
| F11         | 8098671       | 5.6883545   |                       | up           |             | 0.004182067       | 5.576089E-4  | *                                    |
| PLG         | 8123259       | 3.113888    |                       | up           |             | 0.002581835       | 1.7212232E-4 | *                                    |
| F13A1       | 8123744       | 2.233513    |                       | down         |             | 0.54852325        | 0.40225038   |                                      |
| F10         | 7970241       | 1.7014513   |                       | up           |             | 0.4975024         | 0.269627     |                                      |
| FGB         | 8097910       | 1.6944155   |                       | down         |             | 0.015524478       | 0.003104896  | *                                    |
| F13B        | 7923073       | 1.6196274   |                       | down         |             | 0.4975024         | 0.24436827   |                                      |
| SERPINC1    | 7922420       | 1.5490543   |                       | down         |             | 0.54852325        | 0.37034133   |                                      |
| VWF         | 7960464       | 1.5394      |                       | down         |             | 0.4975024         | 0.29850143   |                                      |
| F12         | 8116033       | 1.3436115   |                       | up           |             | 0.6435278         | 0.60062593   |                                      |
| PROC        | 8045018       | 1.245822    |                       | down         |             | 0.6435278         | 0.5670104    |                                      |
| PROS1       | 8089015       | 1.1732916   |                       | down         |             | 0.11162717        | 0.037209056  |                                      |
| F2          | 7939706       | 1.117765    |                       | down         |             | 0.92382735        | 0.92382735   |                                      |
| PROS1       | 8089011       | 1.095369    |                       | up           |             | 0.5775279         | 0.4620223    |                                      |
| F7          | 7970232       | 1.0684249   |                       | down         |             | 0.45363718        | 0.18145487   |                                      |
| F9          | 8170215       | 1.0481349   |                       | down         |             | 0.10211771        | 0.02723139   |                                      |

### cAMP(+) VS cAMP (-)

| Gene Symbol | Affymetrix ID | Fold Change | cAMP(+) VS cAMP(-) | Direction of | Fold Change | Corrected p-value | p-value      | Significant in Post-hoc Tukey (p<.1) |
|-------------|---------------|-------------|--------------------|--------------|-------------|-------------------|--------------|--------------------------------------|
| F9          | 8170215       | 3.0743692   |                    | up           |             | 0.10211771        | 0.02723139   |                                      |
| F11         | 8098671       | 2.358331    |                    | up           |             | 0.004182067       | 5.576089E-4  | *                                    |
| FGB         | 8097910       | 1.4688783   |                    | down         |             | 0.015524478       | 0.003104896  | *                                    |
| F7          | 7970232       | 1.4170613   |                    | down         |             | 0.45363718        | 0.18145487   |                                      |
| PROS1       | 8089015       | 1.2703807   |                    | down         |             | 0.11162717        | 0.037209056  |                                      |
| F12         | 8116033       | 1.1323404   |                    | up           |             | 0.6435278         | 0.60062593   |                                      |
| PROS1       | 8089011       | 1.1102681   |                    | down         |             | 0.5775279         | 0.4620223    |                                      |
| F13B        | 7923073       | 1.1000786   |                    | down         |             | 0.4975024         | 0.24436827   |                                      |
| F10         | 7970241       | 1.0886061   |                    | down         |             | 0.4975024         | 0.269627     |                                      |
| F2          | 7939706       | 1.0793462   |                    | down         |             | 0.92382735        | 0.92382735   |                                      |
| VWF         | 7960464       | 1.0779397   |                    | down         |             | 0.4975024         | 0.29850143   |                                      |
| SERPINC1    | 7922420       | 1.0443034   |                    | up           |             | 0.54852325        | 0.37034133   |                                      |
| F13A1       | 8123744       | 1.0372078   |                    | up           |             | 0.54852325        | 0.40225038   |                                      |
| PROC        | 8045018       | 1.0074449   |                    | down         |             | 0.6435278         | 0.5670104    |                                      |
| PLG         | 8123259       | 1.0009212   |                    | up           |             | 0.002581835       | 1.7212232E-4 |                                      |

## Apolipoproteins

### cAMP(+) VS Primary Hepatocyte

| Gene Symbol | Affymetrix ID | Fold Change | cAMP(+) VS Hepatocyte | Direction of | Fold Change | Corrected p-value | p-value     | Significant in Post-hoc Tukey (p<.1) |
|-------------|---------------|-------------|-----------------------|--------------|-------------|-------------------|-------------|--------------------------------------|
| APOA1       | 8077185       | 5.7201715   |                       | up           |             | 0.006371556       | 0.001820445 | *                                    |
| APOC3       | 7944035       | 2.7706282   |                       | up           |             | 0.08003705        | 0.045735456 | *                                    |
| APOB        | 8050619       | 1.7165838   |                       | up           |             | 0.006371556       | 0.001291146 | *                                    |
| APOA2       | 7921834       | 1.5493222   |                       | up           |             | 0.15048462        | 0.11079896  |                                      |
| APOC2       | 8029551       | 1.4680355   |                       | up           |             | 0.056342013       | 0.024146577 |                                      |
| APOC1       | 8029536       | 1.1765927   |                       | up           |             | 0.31744564        | 0.31744564  |                                      |
| APOC4       | 8029541       | 1.1487213   |                       | down         |             | 0.15048462        | 0.12898682  |                                      |

### cAMP(+) VS cAMP (-)

| Gene Symbol | Affymetrix ID | Fold Change | cAMP(+) VS cAMP(-) | Direction of | Fold Change | Corrected p-value | p-value     | Significant in Post-hoc Tukey (p<.1) |
|-------------|---------------|-------------|--------------------|--------------|-------------|-------------------|-------------|--------------------------------------|
| APOC2       | 8029551       | 2.429501    |                    | up           |             | 0.056342013       | 0.024146577 | *                                    |
| APOA1       | 8077185       | 1.8780366   |                    | up           |             | 0.006371556       | 0.001820445 |                                      |
| APOC1       | 8029536       | 1.5829909   |                    | up           |             | 0.31744564        | 0.31744564  |                                      |
| APOC3       | 7944035       | 1.4547877   |                    | up           |             | 0.08003705        | 0.045735456 |                                      |
| APOB        | 8050619       | 1.1659406   |                    | down         |             | 0.006371556       | 0.001291146 |                                      |
| APOA2       | 7921834       | 1.1425041   |                    | up           |             | 0.15048462        | 0.11079896  |                                      |
| APOC4       | 8029541       | 1.0462136   |                    | up           |             | 0.15048462        | 0.12898682  |                                      |

A comparison of expression levels of a selected group of coagulation factor and apolipoprotein genes between cAMP-treated hepatocyte-like cells and primary hepatocytes (blue) and between cAMP-treated and non-treated hepatocyte-like cells (green).

# Table S6. Expression levels of liver related genes, nuclear receptors and transcriptional factors

## Liver genes of interest

### cAMP(+) VS Primary Hepatocyte

| Gene Symbol | Affymetrix ID | Fold Change | cAMP(+) VS Hepatocyte | Direction of | Fold Change | Corrected p-value | p-value       | Significant in | Post-hoc Tukey (p<.1) |
|-------------|---------------|-------------|-----------------------|--------------|-------------|-------------------|---------------|----------------|-----------------------|
| AFP         | 8095646       | 65.93792    |                       | up           |             | 1.00699835E-4     | 4.378254E-6   | *              | *                     |
| AGXT        | 8049737       | 4.618539    |                       | up           |             | 0.013570489       | 0.006858653   | *              | *                     |
| AKR1C4      | 7925939       | 1.1564364   |                       | up           |             | 0.028816327       | 0.021172486   | *              | *                     |
| AKR1D1      | 8136459       | 4.816972    |                       | up           |             | 0.010609764       | 0.003690352   | *              | *                     |
| ALB         | 8095628       | 2.048784    |                       | up           |             | 0.047936797       | 0.039599963   | *              | *                     |
| ALDOB       | 8162884       | 2.979772    |                       | up           |             | 0.013570489       | 0.007301067   | *              | *                     |
| ARG1        | 8122058       | 4.721421    |                       | up           |             | 0.013570489       | 0.007670276   | *              | *                     |
| ASGR1       | 8012043       | 2.2643049   |                       | up           |             | 0.011706066       | 0.005089594   | *              | *                     |
| ASGR2       | 8012028       | 1.2812967   |                       | up           |             | 0.47513378        | 0.4544758     | *              | *                     |
| BAAT        | 8162870       | 4.6314807   |                       | up           |             | 0.020830221       | 0.013584927   | *              | *                     |
| CPS1        | 8048026       | 5.977915    |                       | up           |             | 0.038876355       | 0.030424973   | *              | *                     |
| CPT1A       | 7949971       | 6.476342    |                       | up           |             | 5.8171514E-4      | 1.01167854E-4 | *              | *                     |
| CTPS        | 7900510       | 1.7996519   |                       | up           |             | 0.004022882       | 0.001224356   | *              | *                     |
| FAH         | 7985268       | 2.0180252   |                       | up           |             | 0.06254039        | 0.05710209    | *              | *                     |
| G6PC        | 8007429       | 22.897436   |                       | up           |             | 0.001131729       | 2.5702044E-4  | *              | *                     |
| HMGCS2      | 7919055       | 34.45101    |                       | up           |             | 0.001131729       | 2.9523356E-4  | *              | *                     |
| HP          | 7997188       | 3.59377     |                       | down         |             | 0.01160576        | 0.004541385   | *              | *                     |
| OTC         | 8166769       | 3.481216    |                       | up           |             | 0.058319274       | 0.050712414   | *              | *                     |
| PCK1        | 8063590       | 30.076572   |                       | up           |             | 3.0852502E-4      | 2.6828262E-5  | *              | *                     |
| PCK2        | 7973530       | 1.0236868   |                       | up           |             | 0.9756709         | 0.9756709     | *              | *                     |
| POR         | 8133670       | 4.5288434   |                       | up           |             | 5.665288E-4       | 7.389506E-5   | *              | *                     |
| TAT         | 8002556       | 6.752994    |                       | up           |             | 0.01819622        | 0.01107596    | *              | *                     |
| TDO2        | 8097991       | 5.6013775   |                       | up           |             | 0.028816327       | 0.021299025   | *              | *                     |

### cAMP(+) VS cAMP (-)

| Gene Symbol | Affymetrix ID | Fold Change | cAMP(+) VS cAMP(-) | Direction of | Fold Change | Corrected p-value | p-value       | Significant in | Post-hoc Tukey (p<.1) |
|-------------|---------------|-------------|--------------------|--------------|-------------|-------------------|---------------|----------------|-----------------------|
| PCK1        | 8063590       | 33.72393    |                    | up           |             | 3.0852502E-4      | 2.6828262E-5  | *              | *                     |
| TAT         | 8002556       | 17.730682   |                    | up           |             | 0.01819622        | 0.01107596    | *              | *                     |
| G6PC        | 8007429       | 14.40543    |                    | up           |             | 0.001131729       | 2.5702044E-4  | *              | *                     |
| ARG1        | 8122058       | 9.107302    |                    | up           |             | 0.013570489       | 0.007670276   | *              | *                     |
| ALDOB       | 8162884       | 5.797745    |                    | up           |             | 0.013570489       | 0.007301067   | *              | *                     |
| CPT1A       | 7949971       | 5.121549    |                    | up           |             | 5.8171514E-4      | 1.01167854E-4 | *              | *                     |
| BAAT        | 8162870       | 5.0343623   |                    | up           |             | 0.020830221       | 0.013584927   | *              | *                     |
| POR         | 8133670       | 4.5395484   |                    | up           |             | 5.665288E-4       | 7.389506E-5   | *              | *                     |
| CPS1        | 8048026       | 3.4659047   |                    | up           |             | 0.038876355       | 0.030424973   | *              | *                     |
| AGXT        | 8049737       | 3.361046    |                    | up           |             | 0.013570489       | 0.006858653   | *              | *                     |
| HMGCS2      | 7919055       | 3.0780334   |                    | up           |             | 0.001131729       | 2.9523356E-4  | *              | *                     |
| CTPS        | 7900510       | 3.069189    |                    | up           |             | 0.004022882       | 0.001224356   | *              | *                     |
| TDO2        | 8097991       | 3.0548642   |                    | up           |             | 0.028816327       | 0.021299025   | *              | *                     |
| OTC         | 8166769       | 2.8020606   |                    | up           |             | 0.058319274       | 0.050712414   | *              | *                     |
| FAH         | 7985268       | 2.1173558   |                    | up           |             | 0.06254039        | 0.05710209    | *              | *                     |
| AKR1C4      | 7925939       | 1.9009632   |                    | up           |             | 0.028816327       | 0.021172486   | *              | *                     |
| ASGR1       | 8012043       | 1.5339662   |                    | up           |             | 0.011706066       | 0.005089594   | *              | *                     |
| HP          | 7997188       | 1.353287    |                    | down         |             | 0.01160576        | 0.004541385   | *              | *                     |
| AFP         | 8095646       | 1.3416045   |                    | down         |             | 1.00699835E-4     | 4.378254E-6   | *              | *                     |
| AKR1D1      | 8136459       | 1.2814606   |                    | down         |             | 0.010609764       | 0.003690352   | *              | *                     |
| ASGR2       | 8012028       | 1.0487944   |                    | up           |             | 0.47513378        | 0.4544758     | *              | *                     |
| PCK2        | 7973530       | 1.0429556   |                    | up           |             | 0.9756709         | 0.9756709     | *              | *                     |
| ALB         | 8095628       | 1.0322695   |                    | up           |             | 0.047936797       | 0.039599963   | *              | *                     |

## Nuclear Receptors and Transcriptional Factors

### cAMP(+) VS Primary Hepatocyte

| Gene Symbol | Affymetrix ID | Fold Change | cAMP(+) VS Hepatocyte | Direction of | Fold Change | Corrected p-value | p-value     | Significant in | Post-hoc Tukey (p<.1) |
|-------------|---------------|-------------|-----------------------|--------------|-------------|-------------------|-------------|----------------|-----------------------|
| PPARGC1A    | 8099633       | 8.664994    |                       | up           |             | 6.924728E-4       | 6.924728E-5 | *              | *                     |
| PPARA       | 8073826       | 4.299654    |                       | up           |             | 0.006155438       | 0.001846631 | *              | *                     |
| RXRA        | 8159127       | 3.0369213   |                       | up           |             | 0.060834873       | 0.038636036 | *              | *                     |
| HNF4A       | 8062823       | 2.534574    |                       | up           |             | 0.006155438       | 0.001739987 | *              | *                     |
| NR1I3       | 7921840       | 2.3120933   |                       | up           |             | 0.05959569        | 0.023838276 | *              | *                     |
| NR1H4       | 7957835       | 1.6012238   |                       | up           |             | 0.5780357         | 0.52023214  | *              | *                     |
| HNF4G       | 8146986       | 1.5168575   |                       | up           |             | 0.060834873       | 0.04258441  | *              | *                     |
| NR1I2       | 8081925       | 1.5157825   |                       | down         |             | 0.117566794       | 0.09405343  | *              | *                     |
| AHR         | 8131614       | 1.4667602   |                       | up           |             | 0.060834873       | 0.032607585 | *              | *                     |
| RARA        | 8007084       | 1.119617    |                       | down         |             | 0.6022417         | 0.6022417   | *              | *                     |

### cAMP(+) VS cAMP (-)

| Gene Symbol | Affymetrix ID | Fold Change | cAMP(+) VS cAMP(-) | Direction of | Fold Change | Corrected p-value | p-value     | Significant in | Post-hoc Tukey (p<.1) |
|-------------|---------------|-------------|--------------------|--------------|-------------|-------------------|-------------|----------------|-----------------------|
| PPARGC1A    | 8099633       | 5.670558    |                    | up           |             | 6.924728E-4       | 6.924728E-5 | *              | *                     |
| RXRA        | 8159127       | 2.6896641   |                    | up           |             | 0.060834873       | 0.038636036 | *              | *                     |
| PPARA       | 8073826       | 2.247845    |                    | up           |             | 0.006155438       | 0.001846631 | *              | *                     |
| NR1I3       | 7921840       | 1.9786081   |                    | up           |             | 0.05959569        | 0.023838276 | *              | *                     |
| HNF4A       | 8062823       | 1.7265012   |                    | up           |             | 0.006155438       | 0.001739987 | *              | *                     |
| AHR         | 8131614       | 1.4156159   |                    | down         |             | 0.060834873       | 0.032607585 | *              | *                     |
| HNF4G       | 8146986       | 1.1821347   |                    | down         |             | 0.060834873       | 0.04258441  | *              | *                     |
| RARA        | 8007084       | 1.0773768   |                    | up           |             | 0.6022417         | 0.6022417   | *              | *                     |
| NR1I2       | 8081925       | 1.0684412   |                    | up           |             | 0.117566794       | 0.09405343  | *              | *                     |
| NR1H4       | 7957835       | 1.0335269   |                    | down         |             | 0.5780357         | 0.52023214  | *              | *                     |

A comparison of expression levels of a selected group of liver-related genes, nuclear receptors and transcriptional factors between cAMP-treated hepatocyte-like cells and primary hepatocytes (blue) and between cAMP-treated and non-treated hepatocyte-like cells (green).

Table S7. Antibody lists

Primary Antibody List (related to Figure1-6)

| Antibody      | Company        | Product Codes | Ig Species | Conjugate | Dilution                      |
|---------------|----------------|---------------|------------|-----------|-------------------------------|
| AFP           | DAKO           | A0008         | Rabbit     | none      | 1:4000(Flow), 1:2000 (Immuno) |
| ALB           | Bethyl         | A80-129A      | Goat       | none      | 1:200(Flow), 1:400(Immuno)    |
| ALB           | DAKO           | A0001         | Rabbit     | none      | 1:400(Flow), 1:4000(Immuno)   |
| E-cadherin    | BD Biosciences | 610181        | Mouse      | none      | 1:200 (Immuno)                |
| HNF4 $\alpha$ | Santa Cruz     | sc-6556       | Goat       | none      | 1:200(Immuno)                 |
| ASGPR1        | Santa Cruz     | SC13467       | Goat       | none      | 1:100(Flow), 1:100(Immuno)    |
| CD117 (c-KIT) | BD Pharmingen  | BD 340529     | Mouse IgG1 | PE        | 1:50(Flow)                    |
| CD117 (c-KIT) | Invitrogen     | CD11705       | Mouse IgG1 | APC       | 1:100(Flow)                   |
| CD184(CXCR4)  | BD Pharmingen  | BD 555974     | Mouse IgG1 | PE        | 1:100(Flow)                   |
| CD184(CXCR4)  | BD Pharmingen  | BD 555976     | Mouse IgG1 | APC       | 1:50(Flow)                    |
| CD31          | BD Pharmingen  | BD 555456     | Mouse IgG1 | PE        | 1:10 (Flow)                   |
| CD326(EPCAM)  | eBioscience    | 12-9326-73    | Mouse IgG1 | PE        | 1:20(Flow)                    |
| CD90          | BioLegend      | 328110        | Mouse IgG1 | PE        | 1:400(Flow)                   |
| FOXA2         | Abcam          | Ab40874       | Rabbit     | none      | 1:50 (Flow)                   |
| SOX17         | R&D            | AF1924        | Goat       | none      | 1:40(Flow), 1:100(Immuno)     |

IgG control List

| IgG Control | Company                | Product Code | Concentration (Stock) |
|-------------|------------------------|--------------|-----------------------|
| Goat IgG    | Sigma                  | Sigma I5256  | 1mg/ml                |
| Rabbit IgG  | Jackson ImmunoResearch | 001-000-003  | 11mg/ml               |

Secondary Antibody List

| Antibody                                         | Company                | Product Code | Dilution |
|--------------------------------------------------|------------------------|--------------|----------|
| IgG goat anti-Mouse cy3                          | Jackson ImmunoResearch | 115-166-071  | 1:300    |
| IgG Donkey anti Rabbit Cy3                       | Jackson ImmunoResearch | 711-165-152  | 1:300    |
| IgG F(ab') <sub>2</sub> Donkey anti- Rabbit (PE) | Jackson ImmunoResearch | 711-116-152  | 1:300    |
| IgG Donkey anti-Goat Alexa 488                   | Invitrogen             | A11055       | 1:400    |
| IgG goat anti-Rabbit Alexa 488                   | Invitrogen             | A11008       | 1:400    |

Primary antibody list for flow cytometry and immunofluorescence analysis.

IgG control for flow cytometry and immunofluorescence analysis.

Secondary antibody list for flow cytometry and immunofluorescence analysis.

Table S8. Quantitative PCR primer and RNA RNA lists  
qPCR primer list (=related to Figs 1-6)

| Gene             | Sequences (Forward)               | Sequences (Reverse)              |
|------------------|-----------------------------------|----------------------------------|
| AFP              | 5'- ACAGAGGAACAACCTTGAGGCTGTC-3'  | 5'- AGCAAAGCAGACTTCCTGTTCTG-3'   |
| ALB              | 5'- GTGAAACACAAGCCCAAGGCAACA-3'   | 5'- TCAGCCTTGCAGCACTTCTCTACA -3' |
| BRY (T)          | 5'- TGTCCCAGGTGGCTTACAGAT GAA -3' | 5'- GGTGTGCCAAAGTTGCCAATACAC -3' |
| CD31             | 5'- TTCCTGACAGTGTCTTGAGTGGGT-3'   | 5'- TTTGGCTAGGCGTGGTTCTCATCT-3'  |
| CD90             | 5'- ATACCAGCAGTTCACCCATTCAGT-3'   | 5'- AATTGCTGGTGAAGTTGGTTCGGG-3'  |
| CPS1             | 5'- AATCTCGCAAGGTGGACTCCAAGA-3'   | 5'- GGTGTCTGCATCTCTATGCTGCTT-3'  |
| CYP1A2           | 5'- ATGATGCTGTTTGGCATGGGCAAC-3'   | 5'- GAACTCCAGTTGCTGTAGCAGGAT-3'  |
| CYP2B6           | 5'- TCTTCCAGTCCATTACCGCCAACA-3'   | 5'- GCCGAATACAGAGCTGATGAGTGA-3'  |
| CYP3A4           | 5'- TTGAGTCAAGGGATGGCACCGTAA-3'   | 5'- TCTCTGGTGTCTCAGGCACAGAT-3'   |
| CYP3A7           | 5'- GCACATCATTTGGAGTGAGCATCG-3'   | 5'- TGAGAGAACGAATGGATCTAATGGA-3' |
| CYP7A1           | 5'- TTACAGGACTGCAGAACACCCTCA-3'   | 5'- GCACTGGTGAACAACATTGGACCT -3' |
| FOXA2            | 5'- GCATTCCCAATCTTGACACGGTGA-3'   | 5'- GCCCTTGCAGCCAGAATACACATT-3'  |
| G6P              | 5'- CTGTCAGGCATTGCTGTTGCAGAA-3'   | 5'- ATGGCGAAGCTGAACAGGAAGAAG-3'  |
| GSC              | 5'- ACGATGCTACTTTCTTGACACGC-3'    | 5'- ACCCTCCCGCTCTGTACACTATTTA-3' |
| HEX              | 5'- TGGATAGCTCTCAATGTTCCGCCT-3'   | 5'- TATCGCCCTCAATGTCCACTTCCT-3'  |
| HNF4 $\alpha$    | 5'- TTCTCCAAAGGCTCCCTGTGTTCT-3'   | 5'- AACGAGTCTGGTTTCTGAGGCTGT-3'  |
| MEOX1            | 5'- TGAGGACTGATGCCAAAGAGCAT-3'    | 5'- ATCCAAACTCACGTTGACCTCCCT-3'  |
| MESP1            | 5'- AGCCCAAGTGACAAGGGACAAC-3'     | 5'- AAGGAACCACTTCGAAGGTGCTGA-3'  |
| OCT4             | 5'- ATGCATTCAAACCTGAGGTGCCTGC-3'  | 5'- CCACCCTTTGTGTTCCCAATTCCT-3'  |
| PGC1 $\alpha$    | 5'- GACACTGTGGGTAGCCCATCAA-3'     | 5'- ACTTACCACGGCATGAAGGCAATG-3'  |
| SOX17            | 5'- AGGAAATCCTCAGACTCCTGGGTT-3'   | 5'- CCCAAACTGTTCAAGTGGCAGACA-3'  |
| TAT              | 5'- ACCCGAATTTTCATCCGAGTGGTCA-3'  | 5'- AGCACAATGGTAGTGCTGCTCACA -3' |
| TDO              | 5'- GTGATAGCTCCTACTTCAGCAGTG-3'   | 5'- ATCAGAGCATCGTGGTGTGTAACA-3'  |
| UGT1A1           | 5'- GAGAGAGGTGACTGTCCAGGAC-3'     | 5'- CAAATTCCTGGGATAGTGGATTTT-3'  |
| TBP              | 5'- TGAGTTGCTCATACCCTGCTGCTA-3'   | 5'- CCCTCAAACCAACTTGTCAACAGC-3'  |
| TBP (for UGT1A1) | 5'- TGTGCACAGGAGCCAAGAGT-3'       | 5'- ATTTTCTTGCTGCCAGTCTGG-3'     |

## RNA list (related to Figs 1-7)

|     | RNA                         | Source                                                       | Sex             | Lot     | Company              | Product number |
|-----|-----------------------------|--------------------------------------------------------------|-----------------|---------|----------------------|----------------|
| AL1 | human adult liver           | 51-years old                                                 | male            | 7030173 | Clontech             | 636531         |
| AL2 | human adult liver           | pooled from 30,44 and 55 years old 3 individual              | male and female | 603161  | Agilent Technologies | 540017         |
| FL1 | human fetal liver           | pooled from 63 sponatneously aborted fetus, aged 22-40 weeks | male and female | 7030173 | Clontech             | 636540         |
| FL2 | human fetal liver           | 20 weeks fetus                                               | female          | 601607  | BioChain             | R1244149-50    |
| PH1 | primary cultured hepatocyte | 1- year-old                                                  | male            | HH1892  | from Stephen Strom   |                |
| PH2 | primary cultured hepatocyte | 14 months- old                                               | male            | HH1901  | from Stephen Strom   |                |
| PH3 | Human hepatocyte            | 48- years old                                                | male            | ZBH2199 | Zenbio               | RNA-L10-2      |

[Download Table S9](#)

[Download Table S10](#)

[Download Table S11](#)
